# Supplementary material
Source: MDPI journal article supplement (https://www.mdpi.com/2071-1050/13/11/6377)
Supplement: s1 [file s1]

## Supplementary Material

# Environmental and Stress Analysis of Wild Plant Habitat in River Nile Region of Dakahlia Governorate on Basis of Geospatial Techniques

Yasser A. El-Amier<sup>1,\*</sup>, Ahmed El-Zeiny<sup>\*,2</sup>, El-Sayed F. El-Halawany<sup>1</sup>, Ashraf Elsayed<sup>1</sup>, Mohamed A. El-Esawi<sup>3,\*</sup>, Ahmed NourEldeen<sup>4</sup>, Hadeer Darwish<sup>5</sup>, Amal Al-Barty<sup>4</sup>, and Shrouk A. Elagami<sup>1</sup>

<sup>1</sup> Botany Department, Faculty of Science, Mansoura University, Mansoura 35516, Egypt; [yasran@mans.edu.eg](mailto:yasran@mans.edu.eg) (Y.A.E.); [drelhalawany@mans.edu.eg](mailto:drelhalawany@mans.edu.eg) (E.F.E); [ashraf-badawy@mans.edu.eg](mailto:ashraf-badawy@mans.edu.eg) (A.E.); [Shrouk\\_Elagami@outlook.com](mailto:Shrouk_Elagami@outlook.com) (S.A.E.)

<sup>2</sup> Environmental Studies Department, National Authority for Remote Sensing and Space Sciences (NARSS), Cairo 11769, Egypt, [aelzeny@narss.sci.eg](mailto:aelzeny@narss.sci.eg) (A.E.-Z.)

<sup>3</sup> Botany Department, Faculty of Science, Tanta University, Tanta 31527, Egypt; [mohamed.elesawi@science.tanta.edu.eg](mailto:mohamed.elesawi@science.tanta.edu.eg) (M.A.E.-E.)

<sup>4</sup> Department of Biology, College of Sciences, Taif University, P.O. Box 11099, Taif 21944, Saudi Arabia; [a.nourEldeen@tu.edu.sa](mailto:a.nourEldeen@tu.edu.sa) (A.N.); [aalbarty@tu.edu.sa](mailto:aalbarty@tu.edu.sa) (A.A.)

<sup>5</sup> Department of Biotechnology, College of Sciences, Taif University, P.O. Box 11099, Taif 21944, Saudi Arabia; [hadeer@tu.edu.sa](mailto:hadeer@tu.edu.sa) (H.D.)

\* Correspondence: [yasran@mans.edu.eg](mailto:yasran@mans.edu.eg) (Y.A.E.); [aelzeny@narss.sci.eg](mailto:aelzeny@narss.sci.eg) (A.E.Z.); [mohamed.elesawi@science.tanta.edu.eg](mailto:mohamed.elesawi@science.tanta.edu.eg) (M.A.E.-E.); Tel.: +20-1017229120 (Y.A.E.)

## Supplementary Materials

**Table S1.** Coordinates and description of sampling sites along River Nile Damietta branch, Dakahlia Governorate

| Location name          | Sites | Coordinate system |         | Different activities nearby sampling locations from LU/LC analysis                       |
|------------------------|-------|-------------------|---------|------------------------------------------------------------------------------------------|
|                        |       | E                 | N       |                                                                                          |
| Mansoura City<br>(n=9) | 1     | 31.0688           | 31.4058 | Fertilization factory, Urbina activities and agriculture land                            |
|                        | 2     | 31.0881           | 31.4203 | Agricultural lands and grazing animals                                                   |
|                        | 3     | 31.1147           | 31.4306 | Agricultural land, and residential area (El-tawella village)                             |
|                        | 4     | 31.1197           | 31.4320 | Agricultural lands                                                                       |
|                        | 5     | 31.1526           | 31.4497 | Agricultural lands                                                                       |
|                        | 6     | 31.1673           | 31.4714 | Orchids                                                                                  |
|                        | 12    | 31.0453           | 31.3483 | Residential area (Met-khames village)                                                    |
|                        | 13    | 31.0458           | 31.3439 | Agricultural lands and residential area (Met-khames village)                             |
|                        | 14    | 31.0147           | 31.3143 | Residential area (Awish Elhagar village) and abandoned area as well as the brick factory |
| Sherbin City<br>(n=5)  | 7     | 31.1649           | 31.4975 | Orchids                                                                                  |
|                        | 8     | 31.1891           | 31.5113 | Residential areas (Zarka City) and wastewater from Kafr Eldabosy drain                   |
|                        | 9     | 31.1792           | 31.5450 | Agricultural lands, and island in the Nile which is mostly not inhabited                 |
|                        | 10    | 31.1844           | 31.5311 | Near the border of Sherbin City                                                          |
|                        | 11    | 31.1985           | 31.6147 | The residential area of the island and sewage treatment station (Meet Elkholy village)   |
| Aga City (n=6)         | 15    | 30.9803           | 31.2859 | Residential areas (Sanbakht village) and agricultural lands                              |
|                        | 16    | 30.9589           | 31.2444 | Residential areas (Sammanoud City) and Urbina activities                                 |
|                        | 17    | 30.9254           | 31.2618 | Residential areas (Met Abu-Elharis village) and wastewater from Deris drain              |
|                        | 18    | 30.8949           | 31.2343 | Agricultural lands                                                                       |
|                        | 19    | 30.8420           | 31.2462 | Residential areas (Kafr Elmandra village)                                                |
|                        | 20    | 30.7997           | 31.2305 | Residential areas (Met Ashna village) and fish farms                                     |
| Met-Ghamr City (n=4)   | 21    | 30.7405           | 31.2465 | Residential areas (Met-Ghamr City) and Urbina activities                                 |
|                        | 22    | 30.6960           | 31.2673 | Residential areas (Met-Ghamr City)                                                       |
|                        | 23    | 30.6656           | 31.2770 | Residential areas ( Kafr Elnaeem village)                                                |
|                        | 24    | 30.6203           | 31.2646 | Agricultural lands                                                                       |

**Table S2.** Various spectral indices and classes formulas used in the present study.

| Index                                         | Formula                                    | Classes (ranges)             | References |
|-----------------------------------------------|--------------------------------------------|------------------------------|------------|
| Normalized Difference Vegetation Index (NDVI) | $NDVI = \frac{(NIR - Red)}{(NIR + Red)}$   | -1-0.25 No vegetation        | [39]       |
|                                               |                                            | 0.25-0.5 Sparse vegetation   |            |
|                                               |                                            | 0.5-0.75 Moderate vegetation |            |
|                                               |                                            | 0.75-1 Dense vegetation      |            |
| Normalized difference salinity index (NDSI)   | $NDSI = \frac{(Red - NIR)}{(Red + NIR)}$   | -1-0 Non saline              |            |
|                                               |                                            | 0-0.25 Slightly saline       |            |
|                                               |                                            | 0.25-0.5 Moderately saline   |            |
|                                               |                                            | 0.5-1 Highly saline          |            |
| Normalized difference moisture index (NDMI)   | $NDMI = \frac{(NIR - SWIR)}{(NIR + SWIR)}$ | NDMI > 0.1 high humidity     |            |
|                                               |                                            | NDMI < -1) low humidity      |            |

**Table S3.** Enumerated list of plant species along River Nile, Damietta branch (Dakahlia Governorate), together with their families, growth forms, chorotypes, and presence value (P %). Life forms: Th: Therophytes, G: Geophytes, Hy: Hydrophyte, H: Hemicryptophytes, Ch: Chamaephytes, He: Helophytes, Nph: Nanophanerophytes; Chorotypes: COSM: Cosmopolitan, PAL: Palaeotropical, PAN: Pantropical, NEO: Neotropical, ME: Mediterranean, SA: Saharo-Arabian, SZ: Sudano-Zambezian, ES: Euro-Siberian, IT: Irano-Turanian, Cult. & Nat.: Naturalized & Cultivated.

| Species                                             | Family           | Duration  | Life form | Floristic category | P%    |
|-----------------------------------------------------|------------------|-----------|-----------|--------------------|-------|
| <b>a) Hydrophytes</b>                               |                  |           |           |                    |       |
| <b>1. Submerged hydrophytes</b>                     |                  |           |           |                    |       |
| <i>Ceratophyllum demersum</i> L.                    | Ceratophyllaceae | Perennial | Hy        | COSM               | 95.83 |
| <i>Myriophyllum spicatum</i> L.                     | Haloragaceae     | Perennial | Hy        | ME+ES+IT           | 87.50 |
| <b>2. Floating hydrophytes</b>                      |                  |           |           |                    |       |
| <i>Eichhornia crassipes</i> (C.Mart.) Solms.        | Pontederiaceae   | Perennial | Hy        | NEO                | 70.83 |
| <i>Ludwigia stolonifera</i> (Guill. et Perr.) Raven | Onagraceae       | Perennial | He        | SZ                 | 16.67 |
| <i>Lemna gibba</i> L.                               | Araceae          | Perennial | Hy        | COSM               | 12.50 |
| <i>Lemna minor</i> L.                               | Araceae          | Perennial | Hy        | COSM               | 12.50 |
| <i>Pistia stratiotes</i> L.                         | Araceae          | Perennial | Hy        | PAN                | 20.83 |
| <i>Potamogeton nodosus</i> Poir.                    | Potamogetonaceae | Perennial | Hy        | ME+IT              | 20.83 |
| <b>3. Emergent species</b>                          |                  |           |           |                    |       |
| <i>Alternanthera sessilis</i> (L.) DC.              | Amaranthaceae    | Perennial | He        | PAN                | 37.50 |
| <i>Cyperus alopecuroides</i> Rottb.                 | Cyperaceae       | Perennial | He        | PAN                | 50.0  |
| <i>Cyperus articulatus</i> L.                       | Cyperaceae       | Perennial | G, He     | PAN                | 20.83 |
| <i>Cyperus difformis</i> L.                         | Cyperaceae       | Annual    | Th        | PAL                | 4.17  |
| <i>Cyperus papyrus</i> L.                           | Cyperaceae       | Perennial | G, He     | PAL                | 4.17  |
| <i>Echinochloa crus-galli</i> (L.) Beauv            | Poaceae          | Annual    | Th        | PAN                | 4.17  |
| <i>Echinochloa stagnina</i> (Retz.) P. Beauv.       | Poaceae          | Perennial | G, He     | PAL                | 75.0  |
| <i>Leersia hexandra</i> Sw.                         | Poaceae          | Perennial | He        | PAN                | 8.33  |
| <i>Persicaria lapathifolia</i> Willd.               | Polygonaceae     | Perennial | G         | PAL                | 45.83 |
| <i>Persicaria salicifolia</i> Brouss. ex Willd.     | Polygonaceae     | Perennial | G         | PAL                | 70.83 |
| <i>Ranunculus sceleratus</i> L.                     | Ranunculaceae    | Annual    | Th        | ME+IT+ES           | 12.50 |
| <i>Saccharum spontaneum</i> L. Mant. Alt            | Poaceae          | Perennial | G, He     | ME+PAL             | 66.67 |
| <i>Typha domingensis</i> (Pers.) Poir. ex Steud     | Typhaceae        | Perennial | He        | PAN                | 16.67 |
| <b>b) Terrestrial species</b>                       |                  |           |           |                    |       |
| <i>Alhagi graecorum</i> Boiss.                      | Fabaceae         | Perennial | H         | PAL                | 12.50 |
| <i>Amaranthus graecizans</i> L.                     | Amaranthaceae    | Annual    | Th        | ME+IT              | 4.17  |
| <i>Amaranthus lividus</i> L.                        | Amaranthaceae    | Annual    | Th        | ME+IT              | 12.50 |
| <i>Amaranthus viridis</i> L.                        | Amaranthaceae    | Annual    | Th        | ME                 | 20.83 |
| <i>Arundo donax</i> L.                              | Poaceae          | Perennial | G, He     | Cult. & Nat.       | 29.17 |
| <i>Symphotrichum squamatum</i> (Asch.) Dandy        | Asteraceae       | Perennial | Ch        | NEO                | 4.17  |
| <i>Beta vulgaris</i> L. var. <i>cicla</i>           | Chenopodiaceae   | Annual    | Th        | ME+IT+ES           | 4.17  |
| <i>Bidens pilosa</i> L.                             | Asteraceae       | Annual    | Th        | PAN                | 12.50 |
| <i>Capsella bursa-pastoris</i> (L.) Medic           | Brassicaceae     | Annual    | Th.       | COSM               | 4.17  |
| <i>Chenopodium album</i> L.                         | Chenopodiaceae   | Annual    | Th        | COSM               | 12.50 |
| <i>Chenopodium ficifolium</i> Sm.                   | Amaranthaceae    | Annual    | Th        | ME+ES              | 4.17  |
| <i>Chenopodium murale</i> L.                        | Amaranthaceae    | Annual    | Th        | COSM               | 45.83 |
| <i>Convolvulus arvensis</i> L.                      | Convolvulaceae   | Perennial | H         | COSM               | 20.83 |
| <i>Conyza bonariensis</i> (L.) Cronquist            | Asteraceae       | Annual    | Th        | NEO                | 4.17  |
| <i>Cynanchum acutum</i> L.                          | Asclepiadaceae   | Perennial | H         | ME+IT              | 8.33  |
| <i>Cynodon dactylon</i> (L.) Pers.                  | Poaceae          | Perennial | G.        | PAN                | 25    |
| <i>Cyperus rotundus</i> L.                          | Cyperaceae       | Perennial | G         | PAN                | 12.50 |
| <i>Eclipta prostrata</i> L.                         | Asteraceae       | Annual    | Th        | NEO                | 20.83 |
| <i>Ethulia conyzoides</i> L.                        | Asteraceae       | Annual    | Th        | PAL                | 8.33  |
| <i>Euphorbia peplus</i> L.                          | Euphorbiaceae    | Annual    | Th        | ME+IT+ES           | 4.17  |
| <i>Euphorbia terracina</i> L.                       | Euphorbiaceae    | Perennial | H         | ME                 | 4.17  |
| <i>Imperata cylindrical</i> (L.) Raeusch.           | Poaceae          | Perennial | H         | PAL                | 4.17  |
| <i>Ipomoea carnea</i> Jacq.                         | Convolvulaceae   | Perennial | G         | PAN                | 25    |
| <i>Lamium amplexicaule</i> L.                       | Lamiaceae        | Annual    | Th        | ME+IT+ES           | 4.17  |
| <i>Malva parviflora</i> L.                          | Malvaceae        | Annual    | Th        | ME+IT              | 4.17  |
| <i>Panicum repens</i> L.                            | Poaceae          | Perennial | G         | PAN                | 8.33  |
| <i>Pennisetum setaceum</i> (L.) R.Br.               | Poaceae          | Perennial | H         | ME+PAL             | 4.17  |

|                                                              |                 |           |       |              |       |
|--------------------------------------------------------------|-----------------|-----------|-------|--------------|-------|
| <i>Phragmites australis</i> (Cav.) Trin. ex Steud            | Poaceae         | Perennial | G, He | COSM         | 75    |
| <i>Phyla nodiflora</i> (L.) Greene                           | Verbenaceae     | Perennial | Ch    | PAN          | 12.50 |
| <i>Pluchea dioscoridis</i> (L.) DC.                          | Asteraceae      | Perennial | Nph   | SZ+SA        | 37.50 |
| <i>Poa annua</i> L.                                          | Poaceae         | Annual    | Th    | COSM         | 4.17  |
| <i>Portulaca oleracea</i> L.                                 | Portulacaceae   | Annual    | Th    | COSM         | 25.0  |
| <i>Pseudognaphalium luteoalbum</i> (L.) Hilliard & B.L.Burt, | Asteraceae      | Annual    | Th    | COSM         | 8.33  |
| <i>Ricinus communis</i> L.                                   | Euphorbiaceae   | Perennial | Nph   | Cult. & Nat. | 4.17  |
| <i>Rorippa palustris</i> (L.) Besser                         | Brassicaceae    | Biennial  | Th    | ME+ES+IT     | 8.33  |
| <i>Rumex dentatus</i> L.                                     | Polygonaceae    | Annual    | Th    | ME+IT+SA     | 16.67 |
| <i>Senecio aegyptius</i> L.                                  | Asteraceae      | Annual    | Th    | ME+IT+ES     | 4.17  |
| <i>Sisymbrium irio</i> L.                                    | Brassicaceae    | Annual    | Th    | ME+IT+ES     | 4.17  |
| <i>Solanum nigrum</i> L.                                     | Solanaceae      | Annual    | Th    | COSM         | 33.33 |
| <i>Sonchus oleraceus</i> L.                                  | Asteraceae      | Annual    | Th    | COSM         | 25.0  |
| <i>Stellaria pallida</i> (Dumort.) Murb.                     | Caryophyllaceae | Annual    | Th    | ME+ES        | 4.17  |
| <i>Tamarix nilotica</i> (Ehrenb.) Bunge                      | Tamaricaceae    | Perennial | Nph   | SA +SZ       | 8.33  |
| <i>Urtica urens</i> L.                                       | Urticaceae      | Annual    | Th    | ME+IT+ES     | 16.67 |

**Table S4.** Mean and coefficient variation of the importance value (out of 100) of the obtained 3 vegetation groups in 24 sites along River Nile, Damietta branch (Dakahilia). Species in bold are the dominant plants.

| Species                                                      | Vegetation groups |      |       |      |       |      |
|--------------------------------------------------------------|-------------------|------|-------|------|-------|------|
|                                                              | I                 |      | II    |      | III   |      |
|                                                              | Mean              | CV   | Mean  | CV   | Mean  | CV   |
| Size of groups                                               | 3                 |      | 14    |      | 7     |      |
| Total number of species                                      | 32                |      | 52    |      | 33    |      |
| <b>Species present in 3 groups</b>                           |                   |      |       |      |       |      |
| <i>Alternanthera sessilis</i> (L.) DC.                       | 1.08              | 1.73 | 2.31  | 1.13 | 0.38  | 2.65 |
| <i>Arundo donax</i> L.                                       | 2.56              | 1.73 | 1.98  | 1.53 | 0.99  | 2.65 |
| <i>Chenopodium album</i> L.                                  | 4.23              | 0.92 | 6.10  | 0.50 | 14.20 | 0.63 |
| <i>Convolvulus arvensis</i> L.                               | 2.56              | 1.73 | 2.58  | 1.44 | 4.27  | 1.05 |
| <i>Eichhornia crassipes</i> (C. Mart.) Solms.                | 1.08              | 1.73 | 1.67  | 1.50 | 0.57  | 2.65 |
| <b><i>Eichnocloa staginia</i> (Retz)P.Beauv.</b>             | 5.73              | 0.89 | 5.22  | 0.79 | 16.07 | 0.54 |
| <i>Ethulia conyzoides</i> L.                                 | 2.56              | 1.73 | 7.65  | 0.64 | 2.50  | 1.75 |
| <i>Panicum repens</i> L.                                     | 2.56              | 1.73 | 6.23  | 0.58 | 13.77 | 0.81 |
| <i>Phragmites australis</i> (Cav.) Trin .ex Steud            | 3.29              | 0.92 | 8.65  | 0.15 | 4.39  | 1.10 |
| <i>Phyla nodiflora</i> (L.) Greene                           | 1.08              | 1.73 | 6.74  | 0.65 | 7.07  | 1.01 |
| <i>Pluchea dioscoridis</i> (L.) DC.                          | 1.08              | 1.73 | 2.43  | 1.85 | 1.59  | 2.65 |
| <i>Pseudognaphalium luteoalbum</i> (L.) Hilliard & B.L.Burt, | 4.06              | 0.87 | 1.22  | 2.58 | 2.84  | 1.76 |
| <i>Saccharum spontaneum</i> L.                               | 3.82              | 0.89 | 0.60  | 3.74 | 1.74  | 1.73 |
| <i>Urtica urens</i> L.                                       | 2.15              | 1.73 | 0.18  | 3.74 | 4.39  | 1.28 |
| <b>Species present in 2 groups</b>                           |                   |      |       |      |       |      |
| <i>Alhagi graecorum</i> Boiss.                               | -                 | -    | 1.25  | 2.97 | 0.57  | 2.65 |
| <i>Amaranthus lividus</i> L.                                 | -                 | -    | 2.70  | 1.47 | 0.38  | 2.65 |
| <i>Amaranthus viridis</i> L.                                 | 3.33              | 1.73 | 0.35  | 3.74 | -     | -    |
| <i>Ceratophyllum demersum</i> L.                             | 8.29              | 0.15 | 0.31  | 3.74 | -     | -    |
| <i>Chenopodium murale</i> L.                                 | 1.67              | 1.73 | 0.18  | 3.74 | -     | -    |
| <i>Conyza bonariensis</i> (L.) Cronquist                     | -                 | -    | 0.91  | 1.77 | 0.38  | 2.65 |
| <i>Cynodon dactylon</i> (L.) Pers.                           | 2.50              | 1.73 | 0.62  | 2.56 | -     | -    |
| <i>Cyperus alopecuroides</i> Rottb.                          | 5.89              | 0.99 | 2.06  | 1.53 | -     | -    |
| <i>Cyperus articulatus</i> L.                                | -                 | -    | 4.51  | 0.96 | 1.14  | 2.65 |
| <i>Cyperus papyrus</i> L.                                    | -                 | -    | 1.07  | 1.68 | 1.71  | 2.65 |
| <i>Ipomoea carnea</i> Jacq.                                  | 1.08              | 1.73 | 0.27  | 3.74 | -     | -    |
| <i>Ludwigia stolonifera</i> (Guill. et Perr.) Raven          | -                 | -    | 1.86  | 1.50 | 1.32  | 1.73 |
| <i>Lamium amplexicaule</i> L.                                | -                 | -    | 2.13  | 2.50 | 1.02  | 2.65 |
| <i>Lerssia hexandia</i> Sw.                                  | -                 | -    | 0.51  | 3.74 | 2.28  | 1.84 |
| <i>Persicaria salicifolia</i> Brouss. ex Willd.              | 5.31              | 0.42 | 3.97  | 0.94 | -     | -    |
| <i>Poa annua</i> L.                                          | -                 | -    | 3.44  | 1.41 | 1.14  | 2.65 |
| <i>Portulaca oleracea</i> L.                                 | 1.67              | 1.73 | 0.36  | 3.74 | -     | -    |
| <i>Potamogeton nodosus</i> Poir.                             | -                 | -    | 1.35  | 1.99 | 0.57  | 2.65 |
| <i>Ricinus communis</i> L.                                   | -                 | -    | 0.18  | 3.74 | 0.95  | 1.76 |
| <i>Rorippa palustris</i> (L.) Besser                         | 0.83              | 1.73 | 0.27  | 3.74 | -     | -    |
| <i>Rumex dentatus</i> L.                                     | 1.67              | 1.73 | 0.89  | 3.74 | -     | -    |
| <b><i>Senecio aegyptius</i> L.</b>                           | -                 | -    | 10.34 | 0.62 | 2.04  | 2.65 |
| <i>Sonchus oleraceus</i> L.                                  | 3.23              | 1.73 | 2.54  | 1.11 | -     | -    |
| <i>Stellaria pallida</i> (Dumort.) Murb.                     | -                 | -    | 2.04  | 1.49 | 0.38  | 2.65 |
| <i>Typha domingensis</i> (Pers.) Poir ex Steud.              | -                 | -    | 0.59  | 3.61 | 0.57  | 2.65 |
| <b>Species present in one group</b>                          |                   |      |       |      |       |      |
| <i>Amaranthus graecizans</i> L.                              | -                 | -    | -     | -    | 0.57  | 2.65 |
| <i>Beta vulgaris</i> L.                                      | 2.15              | 1.73 | -     | -    | -     | -    |
| <i>Bidens pilosa</i> L.                                      | -                 | -    | 0.87  | 2.09 | -     | -    |
| <i>Capsella bursa pastoris</i> (L.) Medik.                   | -                 | -    | 0.31  | 3.47 | -     | -    |
| <i>Chenopodium ficifolium</i> Sm.                            | -                 | -    | 0.60  | 2.57 | -     | -    |

|                                               |       |      |      |      |      |      |
|-----------------------------------------------|-------|------|------|------|------|------|
| <i>Cyperus difformis</i> L.                   | 1.67  | 1.73 | -    | -    | -    | -    |
| <i>Cyperus rotundus</i> L.                    | -     | -    | 0.41 | 3.74 | -    | -    |
| <i>Echinochloa crusgalli</i> (L.) P. Beauv.   | -     | -    | 1.13 | 2.07 | -    | -    |
| <i>Cynanchum acutum</i> L.                    | -     | -    | 0.62 | 2.56 | -    | -    |
| <i>Eclipta prostrata</i> (L.)L.               | -     | -    | 0.60 | 3.74 | -    | -    |
| <i>Euphorbia peplus</i> L.                    | -     | -    | 0.77 | 2.96 | -    | -    |
| <i>Euphorbia terracina</i> L.                 | 2.56  | 1.73 | -    | -    | -    | -    |
| <i>Imperata cylindrical</i> (L.) Raeusch.     | -     | -    | 0.36 | 3.74 | -    | -    |
| <i>Lemna gibba</i> L.                         | -     | -    | 0.31 | 3.74 | -    | -    |
| <i>Lemna minor</i> L.                         | -     | -    | -    | -    | 4.94 | 1.34 |
| <i>Malva parviflora</i> L.                    | 2.56  | 1.73 | -    | -    | -    | -    |
| <b><i>Myriophyllum spicatum</i> L.</b>        | 11.20 | 0.26 | -    | -    | -    | -    |
| <i>Pennisetum setaceum</i> (L.) R.Br.         | -     | -    | -    | -    | 1.71 | 1.84 |
| <i>Persicaria lapathifolia</i> Willd.         | -     | -    | 0.92 | 2.96 | -    | -    |
| <i>Pistia stratiotes</i> L.                   | -     | -    | 0.65 | 2.58 | -    | -    |
| <i>Ranunculus sceleratus</i> L.               | -     | -    | -    | -    | 3.17 | 2.65 |
| <i>Sisymbrium irio</i> L.                     | -     | -    | 0.17 | 3.74 | -    | -    |
| <i>Solanum nigrum</i> L.                      | 2.56  | 1.73 | -    | -    | -    | -    |
| <i>Symphyotrichum squamatum</i> (Asch.) Dandy | -     | -    | -    | -    | 0.38 | 2.65 |
| <i>Tamarix nilotica</i> (Ehrenb). Bunge       | 2.56  | 1.73 | -    | -    | -    | -    |
